# Supplementary material for: Conformation-based detection of tau seeds with a novel VHH
Source: Research Square preprint supplement (doi:10.21203/rs.3.rs-8274351/v1), 2025-12-08
Supplement: Supplementary file 1 [file ecfb04cad0d080f59dd53659.docx]

**Selective targeting of pathogenic tau seeds via a novel VHH**

**Authors**

Ankit Gupta1, Richard Liu1, Devin Keely1‡, Victoria Sunderman1‡, Yogesh Tak1, Katerina Konstantoulea1,2,3, Sandi-Jo Terpack1, Charles L. White III1, William P. Russ1, Josep Rizo3, Nikolaos Louros1,2,3, Jaime Vaquer-Alicea1,2*, Marc I. Diamond1,2*


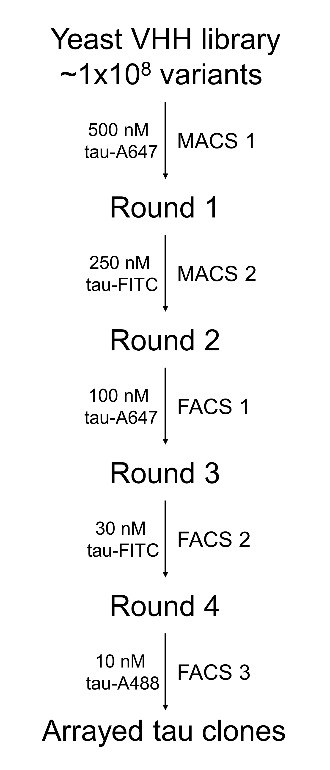


**Figure S1. Initial VHH screening against monomeric tau.**

Schematic of the first phase of VHH selection against full-length tau monomer, consisting of two rounds of Magnetic-Activated Cell Sorting (MACS), followed by three rounds of Fluorescence-Activated Cell Sorting (FACS). The tau concentration was progressively lowered at each round to increase selection stringency, and the fluorophore label was changed to avoid screening bias toward a particular dye.


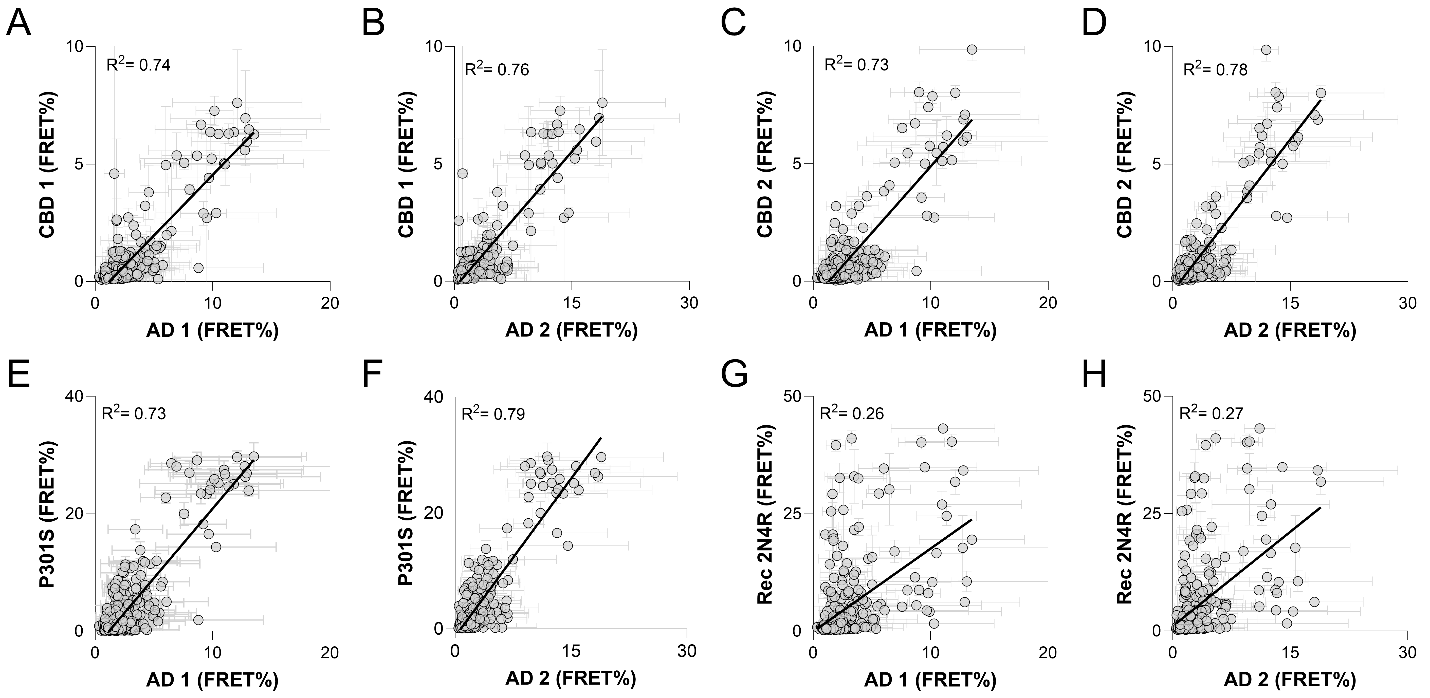


**Figure S2. VHH clones exhibit preferential binding to AD and CBD brain-derived seeds.**

Scatter plots compare FRET% values from the same set of 300 VHH clones tested via IP-and-seeding against multiple tau sources. (**A-D**) Correlation between two AD (AD 1 and AD 2) and two CBD (CBD 1 and CBD 2) cases. (**E, F**) Comparisons between AD and P301S lysates. (**G, H**) Comparisons between AD and heparin-induced 2N4R recombinant fibrils (Rec 2N4R). Notably, the strongest correlations occur between the two AD samples and two CBD samples (Figure 2), whereas the correlation with recombinant fibrils is markedly lower. Data points represent average of two independent experiments (each with technical replicates); error bars = S.D.


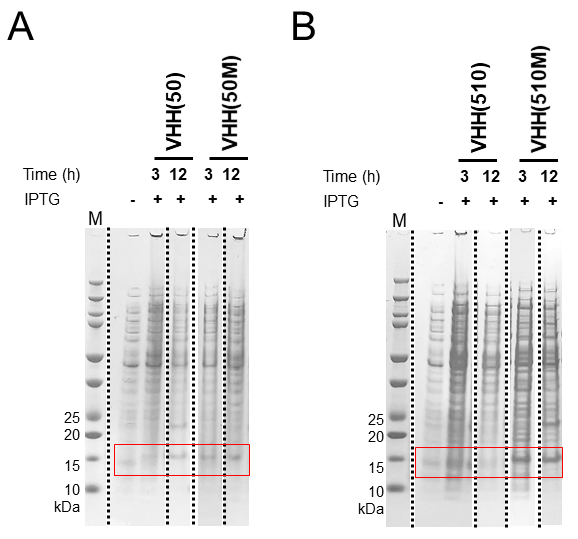


**Figure S3. Recombinant expression of anti-tau VHHs in E. coli.**
(**A**) SDS-PAGE gels showing expression of VHH(50) and VHH(50M). (**B**) Similar analysis for VHH(510) and VHH(510M). In each panel, cultures were induced with 0.25 mM IPTG and harvested after 3 or 12 hours. Cell pellets were lysed in 8 M urea and prepared for SDS-PAGE. The red boxes indicate the expected VHH band around ~15 kDa. M, molecular weight marker; Time (h), induction length in hours.


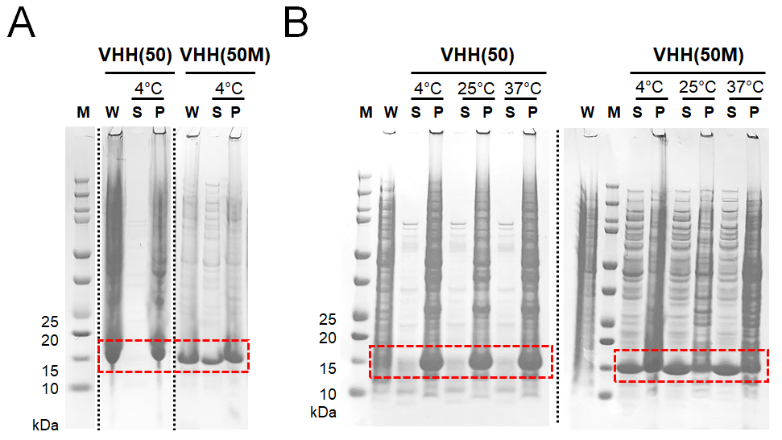


**Figure S4. Temperature-dependent solubility and stability of VHH(50) and VHH(50M).**
SDS-PAGE gels illustrating the impact of temperature on VHH expression and aggregation over time. Cultures were induced for 12 h at 37 °C with 0.25 mM IPTG, followed by lysis in 1×PBS. Both soluble (S) and insoluble (P) fractions were collected and subjected to brief (5 min) or prolonged (48 h) incubation at the indicated temperatures (4 °C, 25 °C, 37 °C) prior to analysis. (**A**) At 5 min post-lysis, wild-type VHH(50) was largely found in the pellet (P), whereas VHH(50M) showed partial solubility. (**B**) After 48 h, the soluble fraction of VHH(50M) remained stable at all temperatures, whereas wild-type VHH(50) exhibited extensive aggregation. Red boxes highlight the expected ~15 kDa VHH band. M: molecular weight marker; W: whole cell lysate (solubilized in 8 M urea).


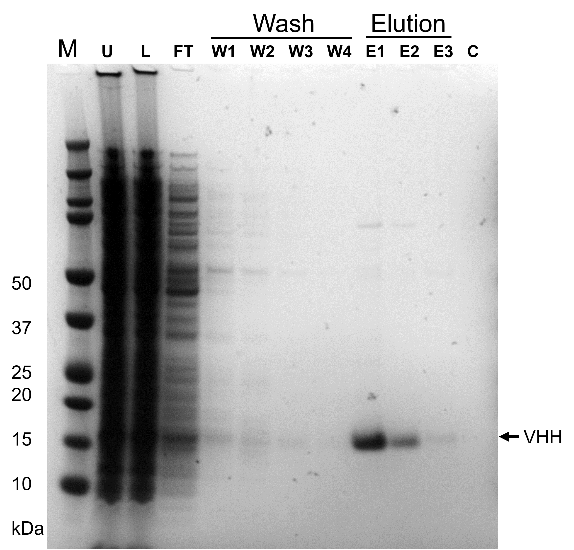


**Figure S5. Purification of anti-tau VHH(510M) using Amsphere™ A3 resin.**
SDS-PAGE gel illustrating each purification step. M, molecular weight marker; U, whole cell lysate in 8 M urea; L, clarified cell lysate loaded onto the A3 column; FT, flow-through containing unbound material; W1–W4, successive wash steps with 1xPBS containing 500 mM, 1 M, 2 M, and 5 M NaCl, respectively; E1–E3, elutions collected with 200 mM glycine (pH 2.5); C, bead cleaning with 1 M NaOH. The purified VHH(510M) (~15 kDa, arrow) elutes in E1 and E2. Pooled fractions were subsequently subjected to size-exclusion chromatography (SEC) to remove high-molecular-weight impurities, and the final purified protein was used in downstream experiments.


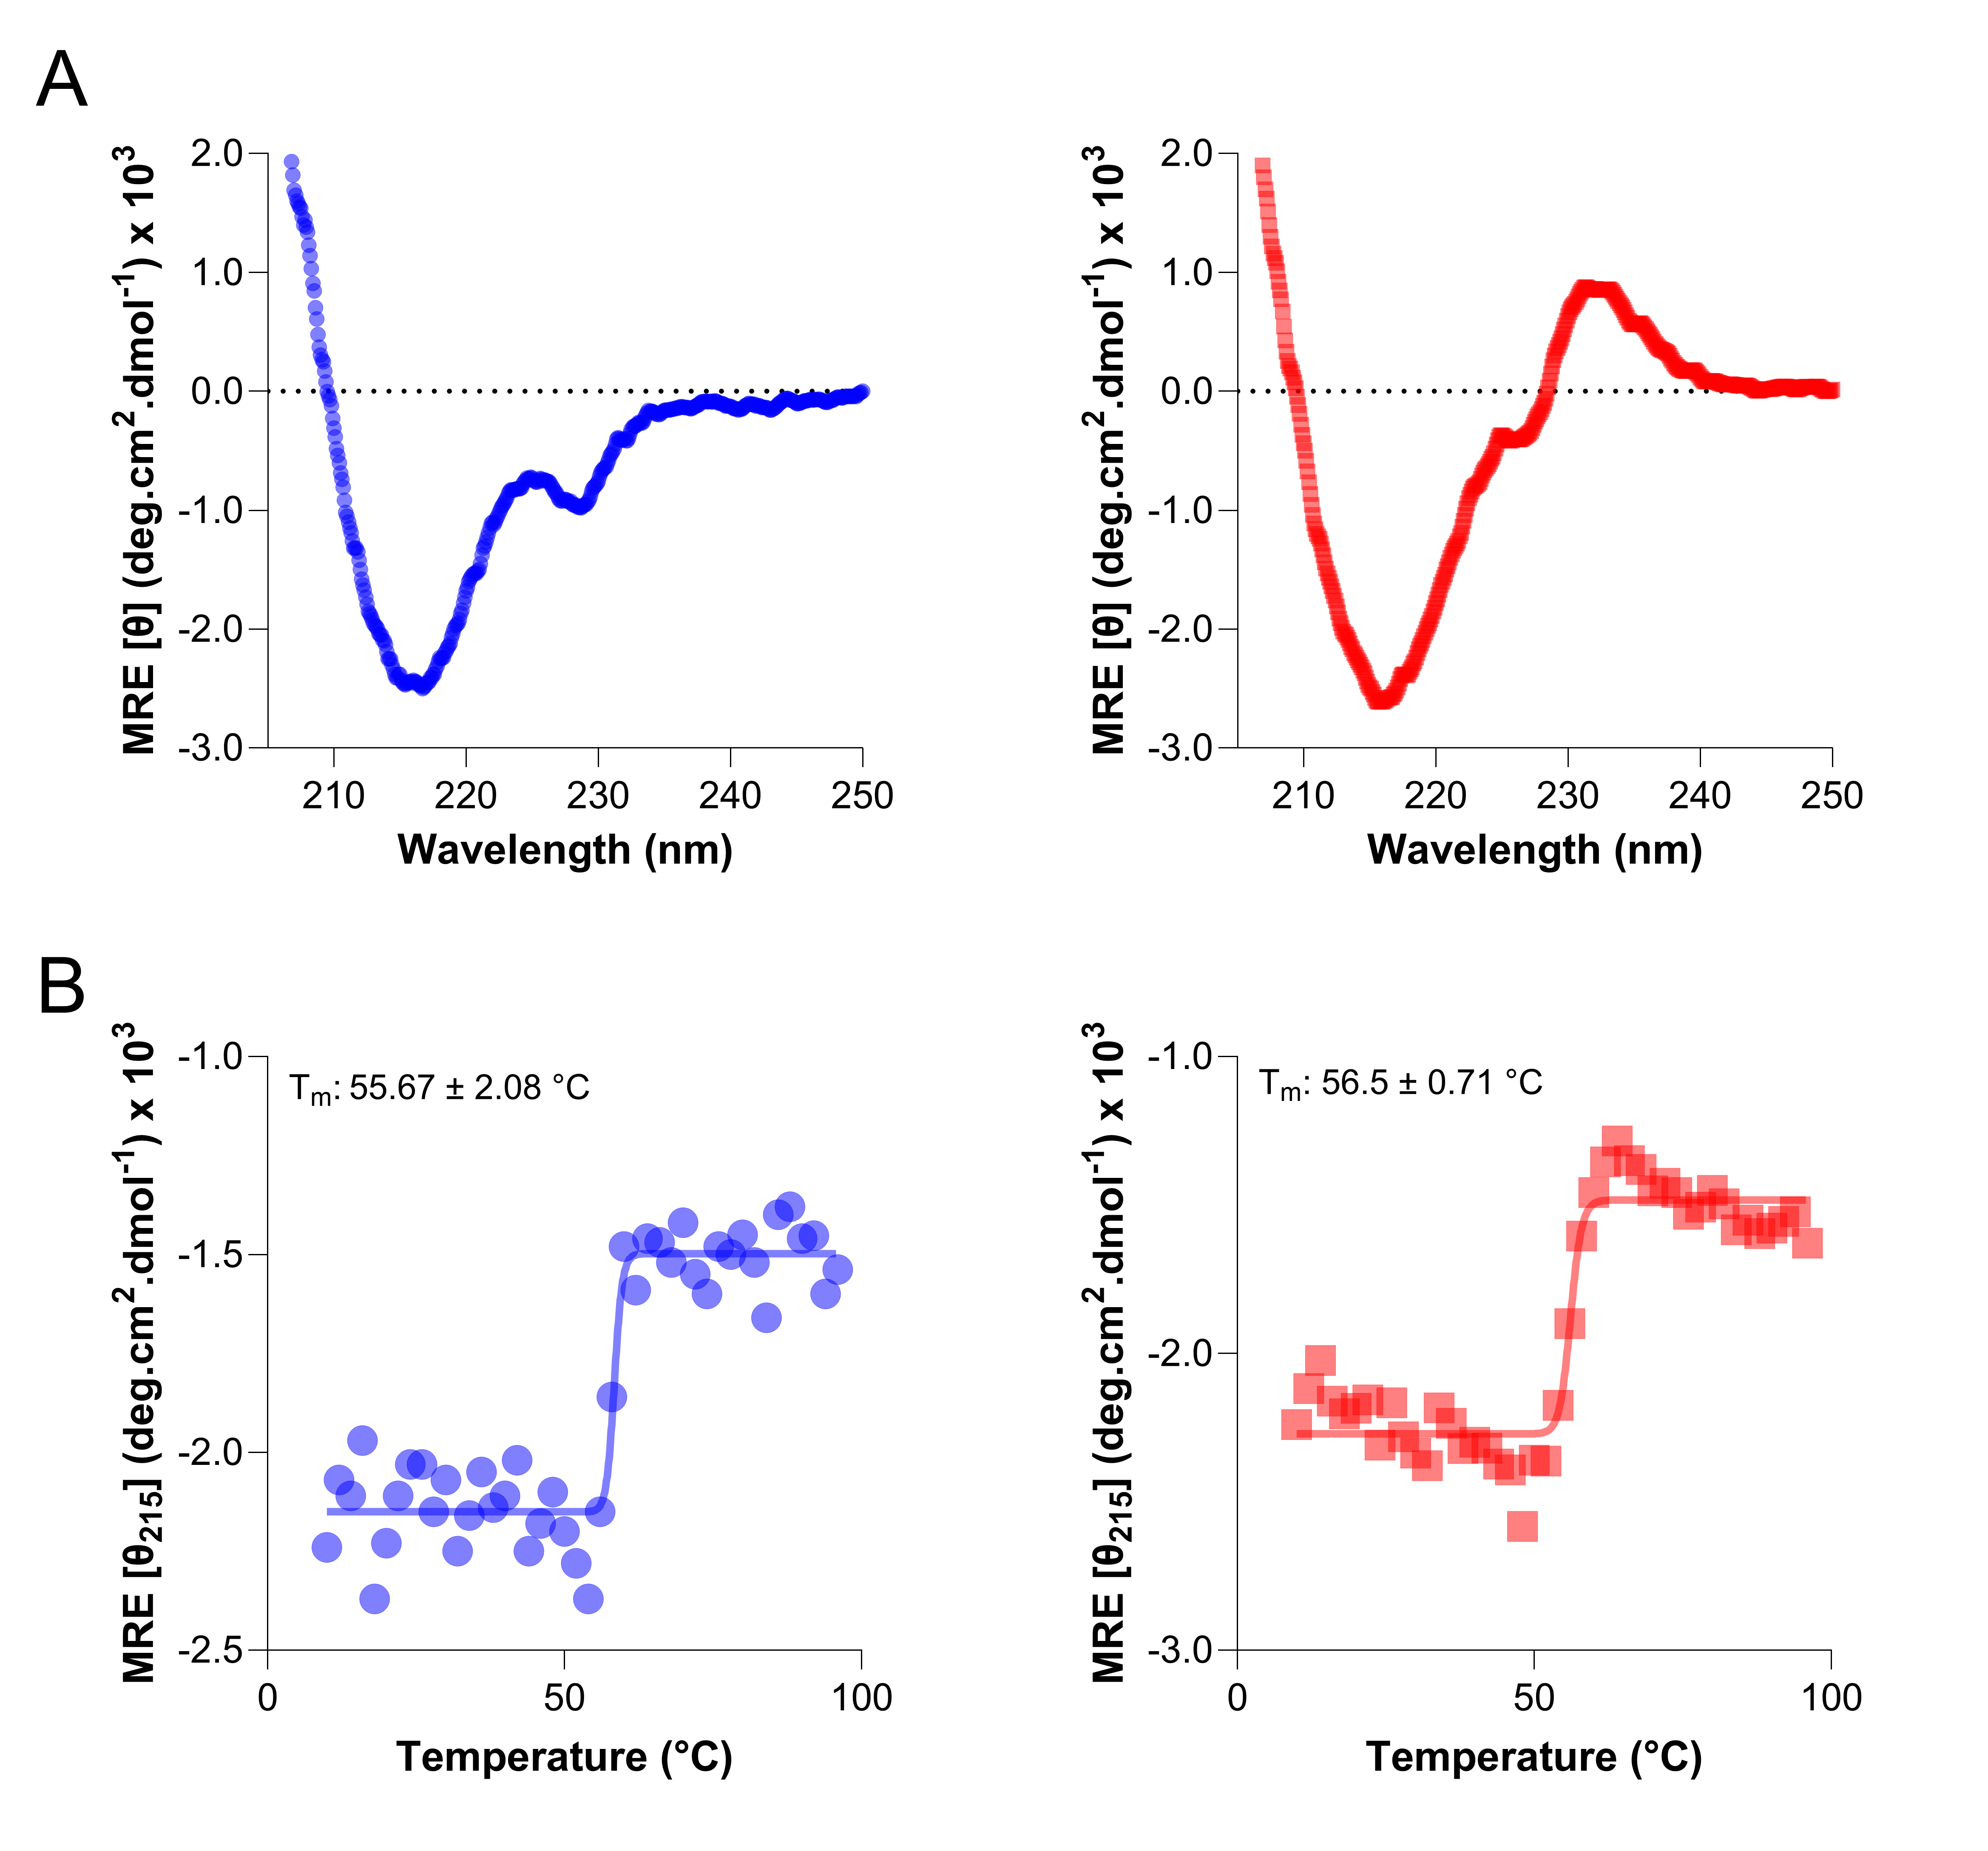


**Figure S6. Confirmation of VHH(510M) folding and stability.** (**A**) Far-UV circular dichroism (CD) spectrum of purified VHH(510M) (left panel: blue), and VHH(50M) (right panel: red) showing a characteristic β-sheet minimum around 215 nm. (**B**) Representative thermal denaturation profile (10 °C to 95 °C), monitored by the change in ellipticity at 215 nm (θ215) for VHH(510M) (left panel: blue), and VHH(50M) (right panel: red). Both the VHHs remain stably folded up to approximately 55 °C, beyond which they transition to an unfolded state.


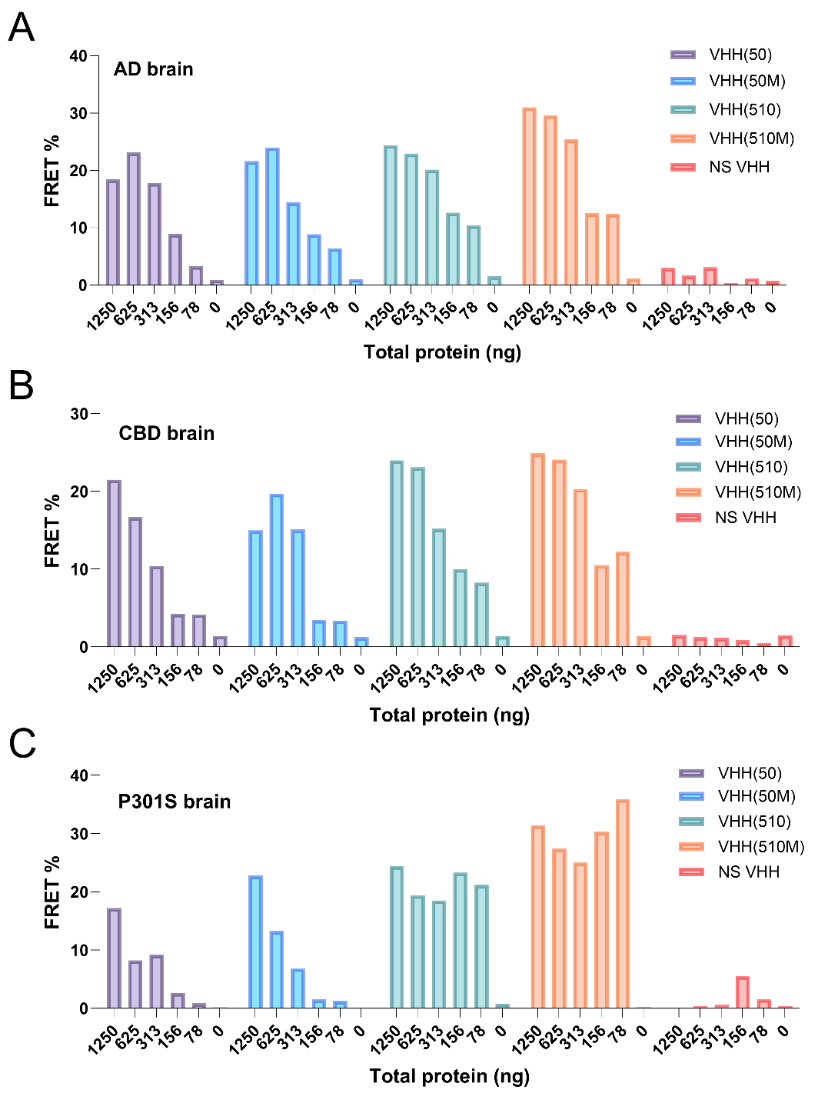


**Figure S7. Comparison of seed-binding by wild-type (WT) and stabilized (M) anti-tau VHHs.**

(**A**-**C**) Immunoprecipitation was performed with purified wild-type VHHs (anti-tau VHH(50) and VHH(510)) and their stabilized counterparts (anti-tau VHH(50M) and VHH(510M)) using Amsphere™ A3 resin across different concentrations of lysate total protein. Bar graphs show the resulting FRET% from v2L tau biosensor cells following IP and elution from (**A**) AD brain lysate, (**B**) CBD brain lysate, and (**C**) P301S mouse brain lysate. A non-specific (NS) VHH was included as a negative control.


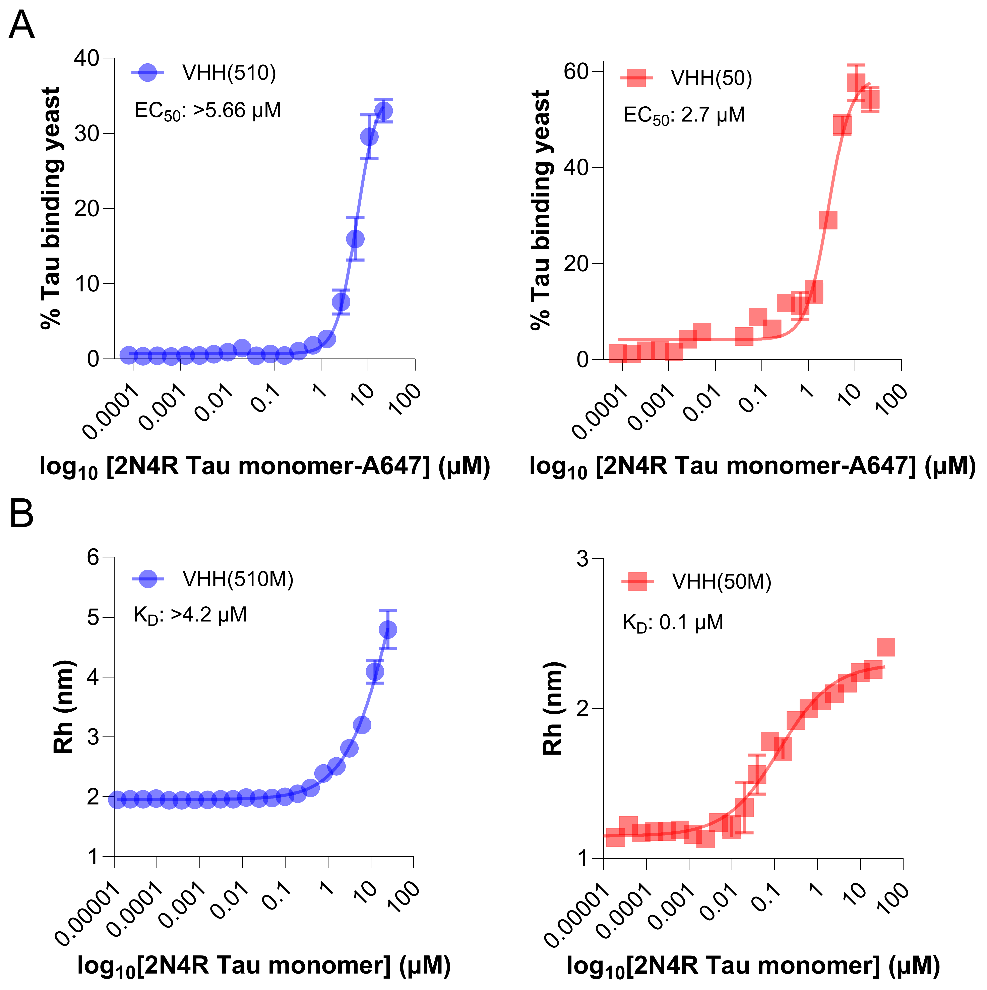


**Figure S8. Affinity measurements of VHH(510M) and VHH(50M) against tau monomer.**
(**A**) On-yeast EC50 measurements for anti-tau VHH(510) (left) and VHH(50) (right) against Alexa-647–labeled 2N4R monomer. Here, the percentage of dual-positive yeast cells (i.e., cells displaying a given VHH on their surface and binding the fluorophore labeled tau) is plotted against increasing concentrations of fluorophore-labeled tau. (**B**) In-solution kinetics of VHH(510M) to tau monomer measured using Flow-Induced Dispersion Analysis (FIDA). The hydrodynamic radius (Rh) of the VHH–tau complex is plotted against various tau concentrations, yielding a KD of >4.2 µM upon fitting to a 1:1 binding model (Note: The post-transition baseline is not clear, it’s difficult to estimate accurate KD). A similar analysis for VHH(50M) yielded a KD of ~0.1 µM.


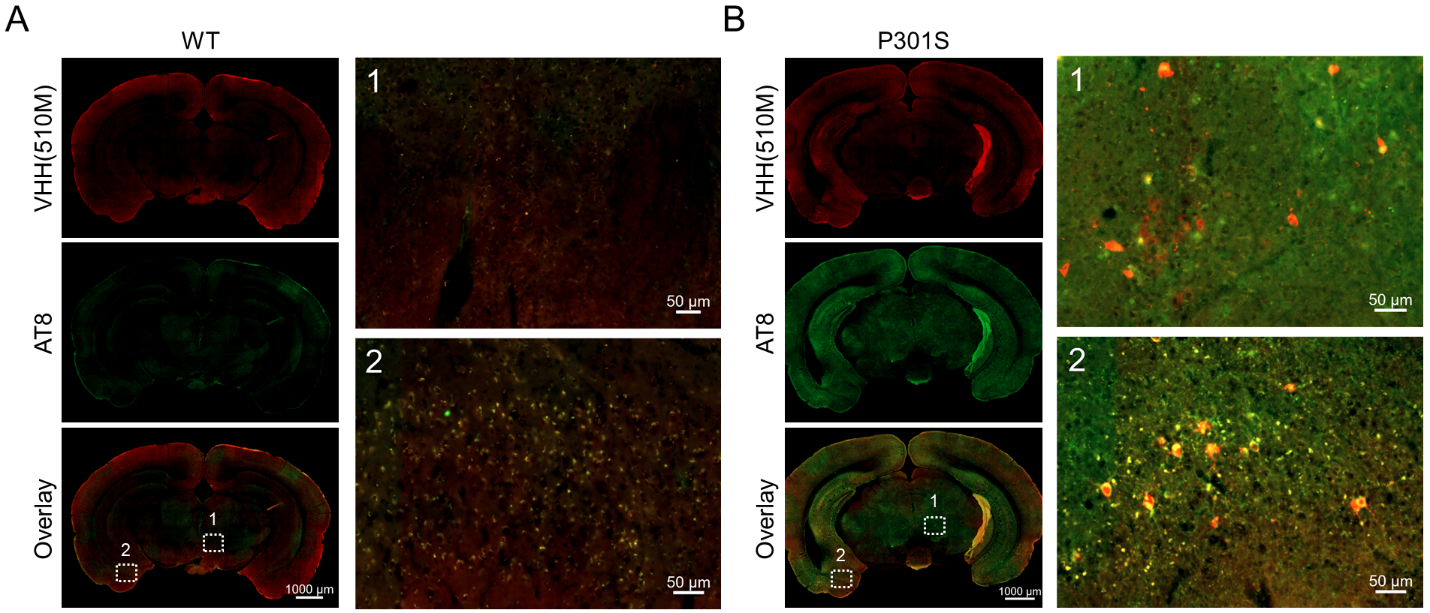


**Figure S9. Immunofluorescent staining of WT and P301S mouse brain sections with VHH(510M).** Representative brain sections from WT (A) and P301S (B) mice at 12 months of age, stained with anti-tau VHH(510M) (red) and phospho-tau antibody AT8 (green). The boxed regions (1 and 2) are shown in the zoomed-in images to the right. The anti-tau VHH(510M) antibody labels inclusions in the P301S tauopathy mouse model, while no staining is observed in the WT mouse brain.

**
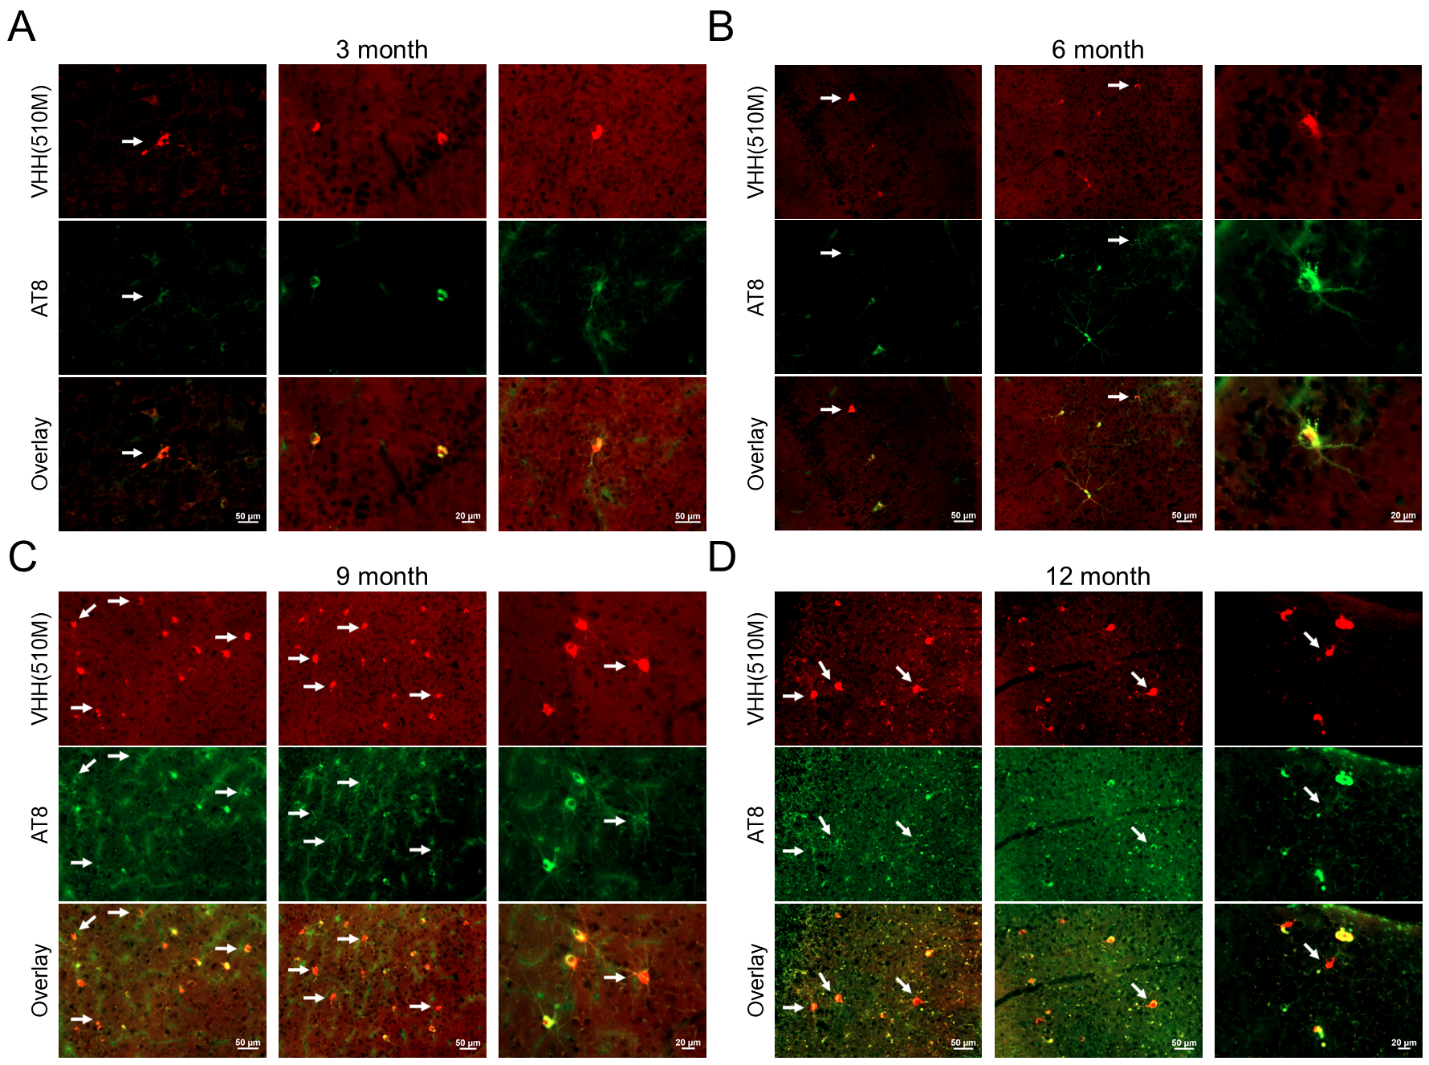
**

**Figure S10. Immunofluorescent staining of P301S mouse brain sections with VHH(510M).**
Representative brain sections from P301S tauopathy mice at 3 (A), 6 (B), 9 (C), and 12 months (D) of age stained with anti-tau VHH(510M) (red) and phospho-tau antibody AT8 (green). The white arrows denote inclusions bound by VHH(510M) but not by AT8, suggesting that VHH(510M) detects additional tau aggregates beyond phosphorylated species. See **Figure 6** for more images.
